**S1 Table. Simulation seeds.**

| Scenario       | Seed                 |
|----------------|----------------------|
| Close contact  | 8838372581797678424  |
| Restaurant     | 4889043484410943750  |
| Choir practice | −2054058476485033808 |
| Queue          | 1436250873317888407  |

All (pseudo-)random numbers used in the simulations with Vadere can be generated by using the listed seeds for the parameter **fixedSeed**.
