# Supplementary material for: Modelling airborne transmission of SARS-CoV-2 at a local scale
Source: PLOS journal article supplement (doi:10.1371/journal.pone.0273820), 2022-08-30
Supplement: S2 (10.1371/journal.pone.0273820.s002) [file redirect.do]

**S2 Table. Parameters of the Optimal Steps Model.**

| Scenario        | seeSmallWalls | pedPotentialIntimateSpaceWidth | pedPotentialPersonalSpaceWidth | pedPotentialHeight | obstPotentialWidth | targetAttractionStrength |
|-----------------|---------------|--------------------------------|--------------------------------|--------------------|--------------------|--------------------------|
| Default         | false         | 0.45                           | 1.2                            | 50                 | 0.8                | 1.0                      |
| Close contact   | false         | <b>0</b>                       | <b>0</b>                       | 50                 | 0.8                | 1.0                      |
| Restaurant      | false         | 0.45                           | 1.2                            | <b>5</b>           | <b>0</b>           | 1.0                      |
| Choir rehearsal | false         | 0.45                           | 1.2                            | <b>5</b>           | 0.8                | 1.0                      |
| Queue (1.0 m)   | true          | 0.45                           | <b>0.5, 1.0</b>                | 50                 | <b>0.4</b>         | <b>0.1</b>               |
| Queue (1.5 m)   |               |                                | <b>1.5</b>                     |                    |                    |                          |
| Queue (2.0 m)   |               |                                | <b>2.0, 2.5</b>                |                    |                    |                          |

We adapted the parameters of Vadere for the Optimal Steps Model to fit the virtual persons' locomotion behaviour to the simulated situation.
